# Supplementary material for: Identification of CRKII, CFL1, CNTN1, NME2, and TKT as Novel and Frequent T-Cell Targets in Human IDH-Mutant Glioma
Source: Oxford University Press journal article supplement (doi:10.1158/1078-0432.ccr-17-1839), 2018-03-21
Supplement: 10780432ccr171839-sup-185529_3_supp_4577410_p499c3.xlsx [file 10780432ccr171839-sup-185529_3_supp_4577410_p499c3.xlsx]

## Sheet: Tabelle1
Suppl. Table 2 Peptide information of potential T cell target antigens, tested by IFN-γ ELISpot
Protein ID	Length [AA]	Sequence (FASTA format)
AIP	50	RARGKPMELIIGKKFKLPVWETIVCTMREGEIAQFLCDIKHVVLYPLVAK
ANXA1	51	GTDVNVFNTILTTRSYPQLRRVFQKYTKYSKHDMNKVLDLELKGDIEKCL
ANXA2	54	MSTVHEILCKLSLEGDHSTPPSAYGSVKAYTNFDAERDALNIETAIKTKGVDEV
ARHGDIA	50	SLRKYKEALLGRVAVSADPNVPNVVVTGLTLVCSSAPGPLELDLTGDLES
BAG3	50	YPQLRPGYIPIPVLHEGAENRQVHPFHVYPQPGMQRFRTEAAAAAPQRSQ
BCAN	52	LTIPCHVHYLRPPPSRRAVLGSPRVKWTFLSRGREAEVLVARGVRVKVNEAY
BIN1	50	KAQKVFEEMNVDLQEELPSLWNSRVGFYVNTFQSIAGLEENFHKEMSKLN
BLMH	49	VMMEEIFRVVCICLGNPPETFTWEYRDKDKNYQKIGPITPLEFYREHVK
CA1	50	TLLPSSLDFWTYPGSLTHPPLYESVTWIICKESISVSSEQLAQFRSLLSN
CAPZAZ2	49	VRIAAKFIIHAPPGEFNEVFNDVRLLLNNDNLLREGAAHAFAQYNLDQF
CCDC50	50	ATRAYADSYYYEDGGMKPRVMKEAVSTPSRMAHRDQEWYDAEIARKLQEE
CFL1	50	TPEPKGPGDGAEEDEAASGGPGGRGPWSCENFNPLLVAGGVAVAAIALIL
CNDP2	50	SVHEAMTDLILLMGSLVDKRGNILIPGINEAVAAVTEEEHKLYDDIDFDI
CNTN1	50	RATSVALTWSRGSDNHSPISKYTIQTKTILSDDWKDAKTDPPIIEGNMEA
CRKI	54	DSEERSSWYWGRLSRQEAVALLQGQRHGVFLVRDSSTSPGDYVLSVSENSRVSY
CRKII	53	LGGPEPGPYAQPSVNTPLPNLQNGPIYARVIQKRVPNAYDKTALALEVGELVK
CRYAB	50	FGEHLLESDLFPTSTSLSPFYLRPPSFLRAPSWFDTGLSEMRLEKDRFSV
CST3	50	GVRRALDFAVGEYNKASNDMYHSRALQVVRARKQIVAGVNYFLDVELGRT
CTSB	30	FLGGPKPPQRVMFTEDLKLPASFDAREQWP
CTTN	54	GFGGKFGVQMDRVDQSAVGFEYQGKTEKHASQKDYSSGFGGKYGVQADRVDKSA
DDAH1	50	ASAASSTSSPKAEDGATPSPSNETPKKKKKRFSFKKSFKLSGFSFKKNKK
DDT	50	RLCAAAASILGKPADRVNVTVRPGLAMALSGSTEPCAQLSISSIGVVGTA
DPSYL3	51	KGVNSFMVYMAYKDLYQVSNTELYEIFTCLGELGAIAQVHAENGDIIAQEQ
DSG1	50	EAMQSLQLSIGVRNKAEFHHSIMSQYKLKASAISVTVLNVIEGPVFRPGS
DTNA	50	CGGKIMDKLRYIFSMISDSSGVMVYGRYDQFLREVLKLPTAVFEGPSFGY
ECHS1	50	FQDCYSSKFLKHWDHLTQVKKPVIAAVNGYAFGGGCELAMMCDIIYAGEK
EEF2	51	KMVPTSDKGRFYAFGRVFSGLVSTGLKVRIMGPNYTPGKKEDLYLKPIQRT
EPB41L2	50	QLRNLPWLFTFNVKFYPPDPSQLTEDITRYFLCLQLRQDIASGRLPCSFV
EZR	51	FNDKKFVIKPIDKKAPDFVFYAPRLRINKRILQLCMGNHELYMRRRKPDTI
FH	50	YVQQVKYAMTRIKAAMPRIYELAAGGTAVGTGLNTRIGFAEKVAAKVAAL
FSCN1	51	RHDGRLVARPEPATGYTLEFRSGKVAFRDCEGRYLAPSGPSGTLKAGKATK
GMFB	50	RFIVYSYKYQHDDGRVSYPLCFIFSSPVGCKPEQQMMYAGSKNKLVQTAE
GRB2	50	VLRDGAGKYFLWVVKFNSLNELVDYHRSTSVSRNQQIFLRDIEQVPQQPT
HLIM	50	RPGTVALREIRRYQKSTELLIRKLPFQRLVREIAQDFKTDLRFQSSAVMA
HSPA4	50	RLRTACERAKRTLSSSTQASLEIDSLFEGIDFYTSITRARFEELCSDLFR
HSPA5	50	FSETLTRAKFEELNMDLFRSTMKPVQKVLEDSDLKKSDIDEIVLVGGSTR
HSPB1	51	LLRGPSWDPFRDWYPHSRLFDQAFGLPRLPEEWSQWLGGSSWPGYVRPLPP
IGFBP2	50	ARMPCAELVREPGCGCCSVCARLEGEACGVYTPRCGQGLRCYPHPGSELP
IgG1	50	SWNSGALTSGVHTFPAVLQSSGLYSLSSVVTVPSSSLGTQTYICNVNHKP
INA	50	LEGEETRFSTSGLSISGLNPLPNPSYLLPPRILSATTSKVSSTGLSLKKE
KHSRP	50	TVQEIMIPAGKAGLVIGKGGETIKQLQERAGVKMILIQDGSQNTNVDKPL
LDHB	51	ALVDVLEDKLKGEMMDLQHGSLFLQTPKIVADKDYSVTANSKIVVVTAGVR
LGALS1	51	GTEQREAVFPFQPGSVAEVCITFDQANLTVKLPDGYEFKFPNRLNLEAINY
MAPK1	50	KTQHLSNDHICYFLYQILRGLKYIHSANVLHRDLKPSNLLLNTTCDLKIC
MARCKS	50	AASAASSTSSPKAEDGATPSPSNETPKKKKKRFSFKKSFKLSGFSFKKNK
MSN	50	IDKKAPDFVFYAPRLRINKRILALCMGNHELYMRRRKPDTIEVQQMKAQA
MTDH	50	WVILVGTGALGLLLLFLLGYGWAAACAGARKKRRSPPRKREEAAAVPAAA
NIT2	50	CYDMRFAELAQIYAQRGCQLLVYPGAFNLTTGPAHWELLQRSRAVDNQVY
NME2	50	FLRASEEHLKQHYIDLKDRPFFPGLVKYMNSGPVVAMVWEGLNVVKTGRV
OMG	50	HIVDLSNNSLTQILPGTLINLTNLTHLYLHNNKFTFIPDQSFDQLFQLQE
PARK7	50	KMMNGGHYTYSENRVEKDGLILTSRGPGTSFEFALAIVEALNGKEVAAQV
PCNP	50	DLPTKPTKISKFGFAIGSQTTKKASAISIKLGSSKPKETVPTLAPKTLSV
PEA15	50	SFLESHNKLDKDNLSYIEHIFEISRRPDLLMVVDYRTRVLKISEEDELDT
PKM2	51	IMVARGDLGIEIPAEKVFLAQKMMIGRCNRAGKPVICATQMLESMIKKPRP
PPP1CA	50	GLCLKSREIFLSQPILLELEAPLKICGDIHGQYYDLLRLFEYGGFPPESN
PRDX1	50	MSSGNAKIGHPAPNFKATAVMPDGQFKDISLSDYKGKYVVFFFYPLDFTF
PRDX4	50	VDSQFTHLAWINTPRRQGGLGPIRIPLLSDLTHQISKDYGVYLEDSGHTL
PSMD9	50	GQSESQGPPRAFAKVNSISPGSPASIAGLQVDDEIVEFGSVNTQNFQSLH
PURA	50	TVDNKRFFFDVGSNKYGVFMRVSEVKPTYRNSITVPYKVWAKFGHTFCKY
RTN1-A	50	QTGIVFGSFLLLLFSLTQFSVVSVVAYLALAALSATISFRIYKSVLQAVQ
RTN1-B	50	LRRLFLVQDLVDSLKFAVLMWLLTYVGALFNGLTLLLMAVVSMFTLPVVY
S100A8	50	VYRDDLKKLLETECPQYIRKKGADVWFKELDINTDGAVNFQEFLILVIKM
S100A9	50	MTCKMSQLERNIETIINTFHQYSVKLGHPDTLNQGEFKELVRKDLQNFLK
SBSN	51	EEDRVVQGLHHGVSQAGREAGQFGHDIHHTAGQAGKEGDIAVHGVQPGVHE
SEPT11	52	DSYKPIVEYIDAQFEAYLQEELKIKRSLFNYHDTRIHACLYFIAPTGHSLKS
SEPT2	50	NSLFLTDLYPERVIPGAAEKIERTVQIEASTVEIEERGVKLRLTVVDTPG
SERPINB12	49	YTLSIANRLYGEQEFPICQEYLDGVIQFYHTTIESVDFQKNPEKSRQEI
SERPINB3	50	QQIKKVLHFDQVTENTTGKAATYHVDRSGNVHHQFQKLLTEFNKSTDAYE
SERPINB5	50	STEFISSTKRPYAKELETVDFKDKLEETKGQINNSIKDLTDGHFENILAD
SIRPA	50	NTGSNERNIYIVVGVVCTLLVALLMAALYLVRIRQKKAQGSTSSTRLHEP
SNRNP70	50	KQGVTEAAEKTKEGVMYVGAKTKENVVQSVTSVAEKTKEQANAVSEAVVS
SOD1	50	VADVSIEDSVISLSGDHCIIGRTLVVHEKADDLGKGGNEESTKTGNAGSR
SPRR2E	50	SYQQQQCKQPCQPPPVCPTPKCPEPCPPPKCPEPCPPPKCPQPCPPQQCQ
STIP1	49	EKELGNDAYKKKDFDTALKHYDKAKELDPTNMTYITNQAAVYFEKGDYN
TF	50	KSCHTAVGRTAGWNIPMGLLYNKINHCRFDEFFSEGCAPGSKKDSSLCKL
TKT	50	NPHNDRFVLSKGHAAPILYAVWAEAGFLAEAELLNLRKISSDLDGHPVPK
TUBB	50	FQLTHSLGGGTGSGMGTLLISKIREEYPDRIMNTFSVVPSPKVSDTVVEP
VCAN	50	VAQNGNIKIGQDYKGRVSVPTHPEAVGDASLTVVKLLASDAGLYRCDVMY
AA: amino acid
